# Supplementary material for: Sustained activation of DNA damage response in irradiated apoptosis-resistant cells induces reversible senescence associated with mTOR downregulation and expression of stem cell markers
Source: PubMed Central journal article supplement — Cell Cycle. 2014 Mar 7;13(9):1424–39. doi: 10.4161/cc.28402 (PMC4050140; doi:10.4161/cc.28402), 2014-03-07

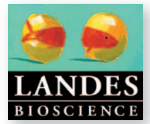

## **Supplemental Material to:**

**Zhanna V Chitikova, Serguei A Gordeev, Tatiana V Bykova,  
Svetlana G Zubova, Valery A Pospelov,  
and Tatyana V Pospelova**

**Sustained activation of DNA damage response in  
irradiated apoptosis-resistant cells induces reversible  
senescence associated with mTOR downregulation and  
expression of stem cell markers**

**Cell Cycle 2014; 13(9)**

**<http://dx.doi.org/10.4161/cc.28402>**

**<http://www.landesbioscience.com/journals/cc/article/28402>**

**Supplementary 1.**  $\gamma$ H2AX and 53BP1 foci formation in REFs. Cells were left untreated or irradiated and stained with antibodies against  $\gamma$ H2AX and 53BP1 after indicated time intervals. Confocal images are shown.

**Supplementary 2.** REFs activate HR and NHEJ repair 30 min after irradiation and complete DNA repair by day 1 post IR-treatment. Cells were exposed to IR or left untreated and stained with antibodies against  $\gamma$ H2AX and Rad51 – (A),  $\gamma$ H2AX and pDNA-PKcs<sup>Ser2056</sup> – (B). Confocal images are shown.

A

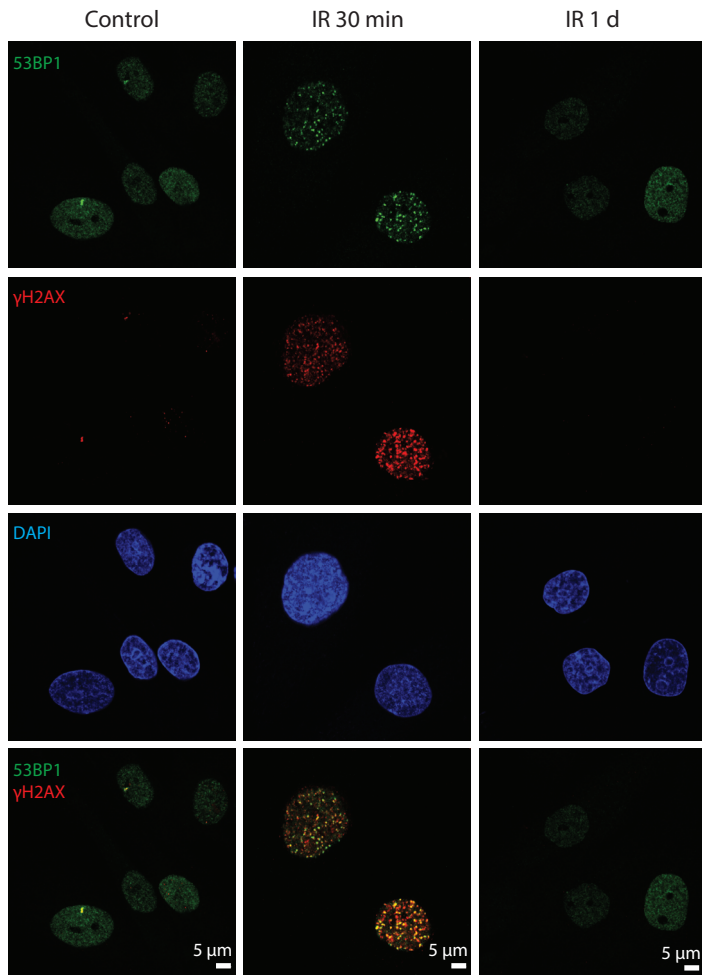

**A**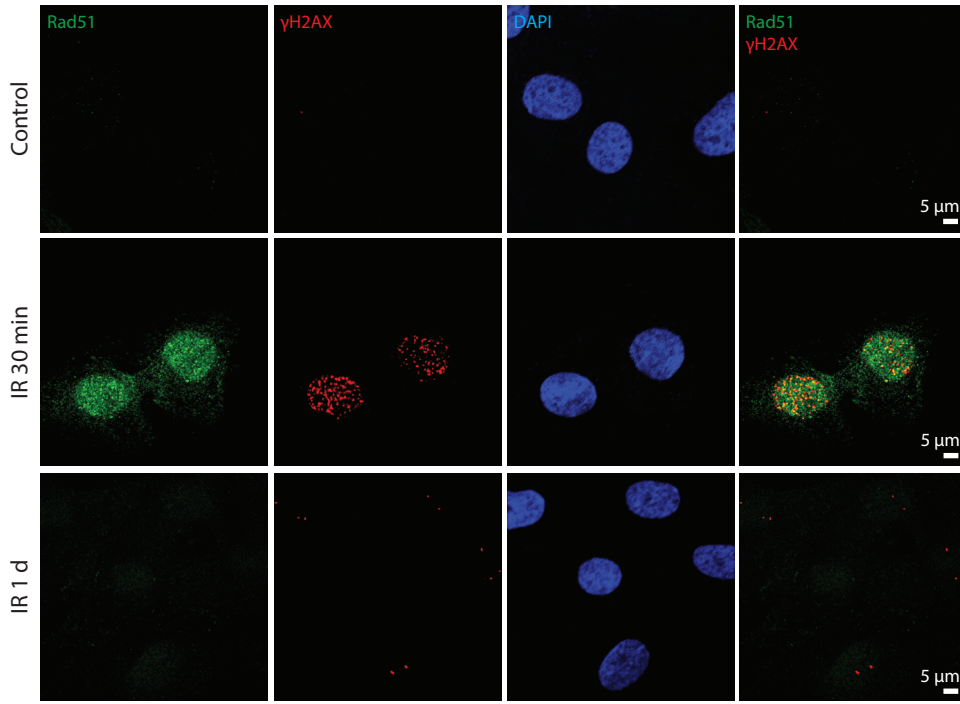**B**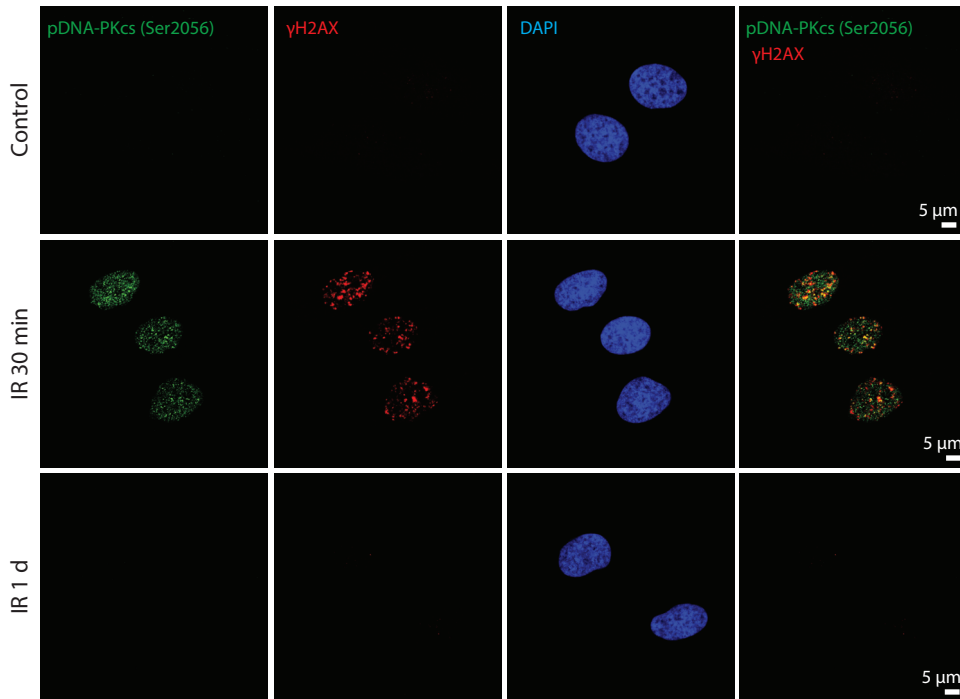

Supplement: cc-13-1424-s01.pdf [file cc-13-1424-s01.pdf]
